# Supplementary material for: Microfabrication-based engineering of biomimetic dentin-like constructs to simulate dental aging
Source: Royal Society of Chemistry journal article supplement (doi:10.1039/d3lc00761h), 2024-01-01
Supplement: d3lc00761h1.pdf [file d3lc00761h1.pdf]

**Supplementary figures:**

**Microfabrication-based engineering of biomimetic dentin-like constructs to simulate dental aging**

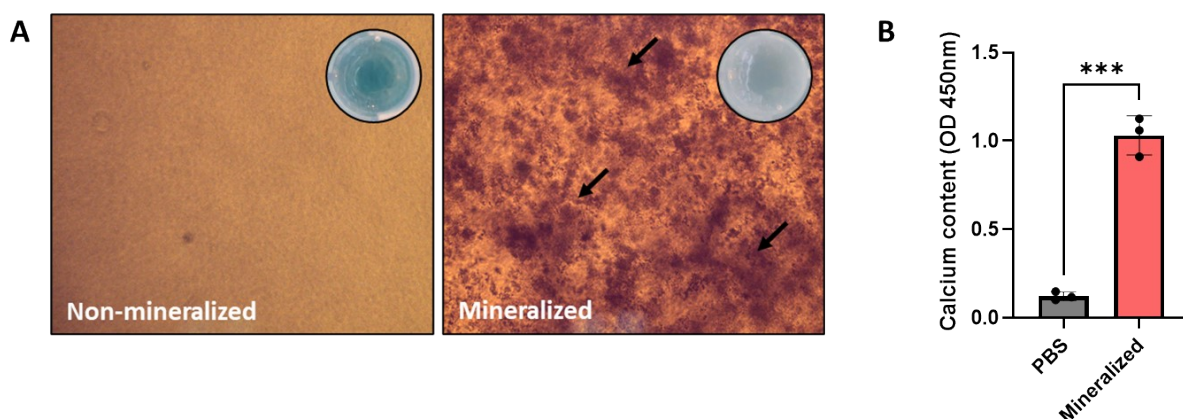

**Supplementary Figure 1: Alizarin Red confirms calcium deposition in type-I collagen substrates.**

(A) Phase contrast microscopy of type-I collagen gels displaying calcium deposition (black arrows, 10X magnification). Insets depict collagen in 96-well plates, where the mineralized gels can be observed with white color and reduced translucency. (B) Quantification of calcium content in collagen as a function of Alizarin Red staining (n=3; t-test).

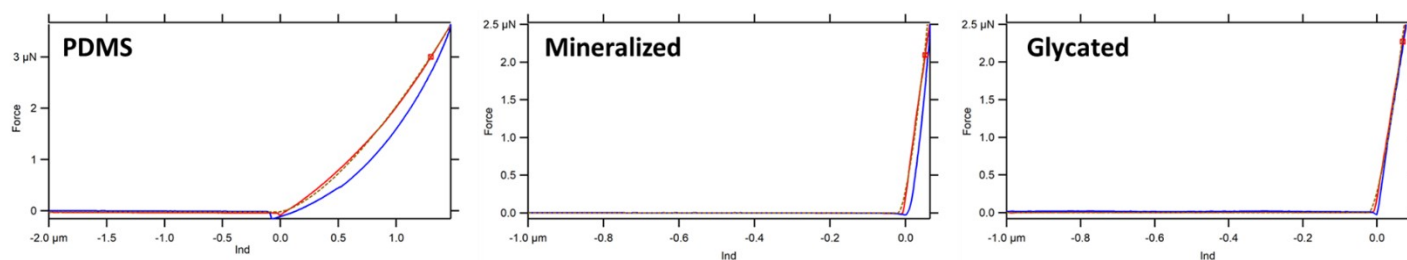

**Supplementary Figure 2: Example AFM indentation curves for PDMS and the mineralized and glycosylated constructs.**

Example force-curves obtained with AFM for all three analyzed conditions, from which the Johnson–Kendall–Roberts (JKR) model was applied to the extension segment of each curve (blue: extension segment; red: retraction segment; dotted line: JKR fit. Obtained with the Asylum Research proprietary software v.16.10.211).

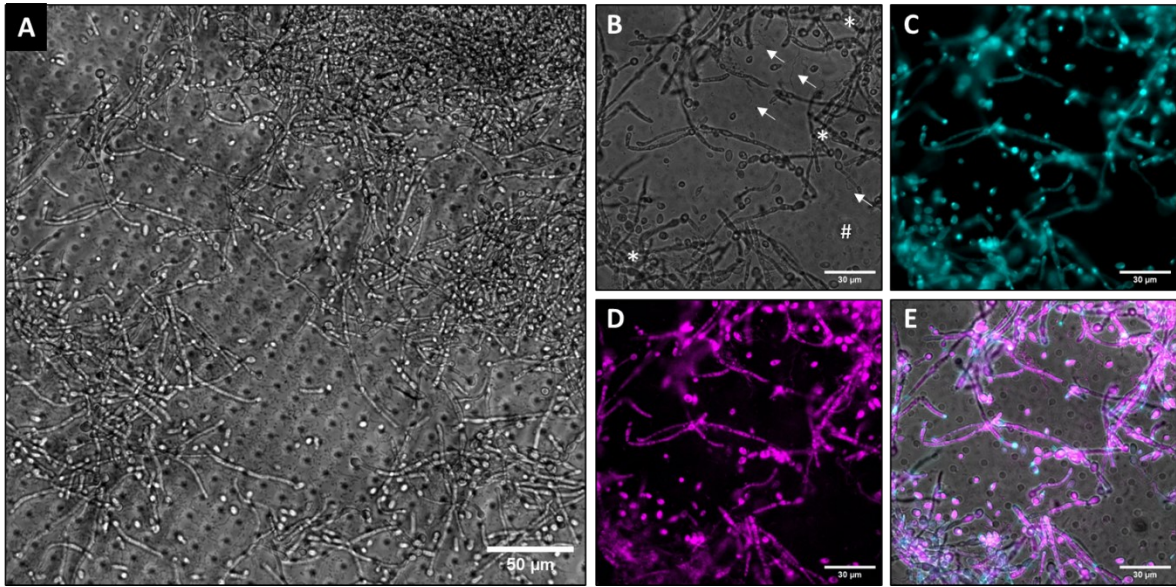

**Supplementary Figure 3: Visualization of dual-species biofilm formation on biomimetic dentin constructs with epifluorescence microscopy.** (A) Phase contrast image of a *C. albicans* and *S. mutans* biofilm on a microfabricated PDMS device. (B) Transmitted light, (C) SYTO9, (D) Calcofluor white, and (E) merged channel images of the dual species biofilm, as a proof-of-concept that the microfabricated substrates can be employed to characterize polymicrobial biofilm formation with an epifluorescence microscopy setup.
